# Supplementary material
Source: publisher figshare collection journal article supplement (https://tandf.figshare.com/ndownloader/files/22221108)
Supplement: Supplementary file 1 [file 22221108]

Table S1. Terrestrial environment CoPC screening of site soil concentration (mg/kg dry weight)

| Chemical   | N   | Site Range   | Reference Range | Site > Reference? <sup>a</sup> | Residential Screening Level <sup>d</sup> | CoPC Flag (Y/N) | Rational for Selection or Deletion |
|------------|-----|--------------|-----------------|--------------------------------|------------------------------------------|-----------------|------------------------------------|
| Aluminum   | 51  | 1,180-16,600 | 1640-12400      | no                             | 13,688                                   | N               | No REF                             |
| Antimony   | 40  | 0.38-14.8    | 0.17-0.6        | ≥50% ND Site                   | 5.5                                      | N               | <b>Yes</b> ASL                     |
| Arsenic    | 75  | 1.3-93.6     | 4.2-35          | no                             | 0.8                                      | C               | No REF                             |
| Barium     | 40  | 357-7,090    | 109-622         | yes                            | 960                                      | N               | <b>Yes</b> ASL                     |
| Cadmium    | 474 | 0.4-388      | 0.24-3.6        | yes                            | 14                                       | N               | <b>Yes</b> ASL                     |
| Chromium   | 40  | 4.9-24       | 4.9-19.3        | no                             | 41                                       | N               | No REF/BSL                         |
| Cobalt     | 40  | 4.2-27       | 7.3-20.6        | no                             | 274                                      | N               | No REF/BSL                         |
| Copper     | 40  | 9.8-109      | 14.3-46.5       | yes <sup>b</sup>               | 548                                      | N               | No BSL                             |
| Fluoride   | 12  | 0.4-1.3      | 0.3-0.5         | yes                            | 821                                      | N               | No BSL                             |
| Iron       | 51  | 2,650-35,000 | 5,750-72,600    | no                             | 4,106                                    | N               | No REF                             |
| Lead       | 468 | 8.5-48,300   | 8.8-142         | yes                            | 400                                      | N               | <b>Yes</b> ASL                     |
| Manganese  | 40  | 280-1,000    | 250-4,080       | no                             | 329                                      | N               | No REF                             |
| Mercury    | 12  | 0.1-1.7      | 0.05-0.18       | yes                            | 2.6                                      | N               | No BSL                             |
| Molybdenum | 40  | 0.35-3.3     | 0.27-2.8        | ≥50% ND Site                   | 68                                       | N               | No BSL                             |
| Nickel     | 40  | 17.3-56.8    | 23.5-51.4       | no                             | 270                                      | N               | No REF/BSL                         |
| Selenium   | 30  | 0.3-3.0      | 0.5-1.0         | ≥50% ND Site                   | 68                                       | N               | No BSL                             |
| Silver     | 40  | 0.14-8.3     | 0.05-0.25       | yes                            | 68                                       | N               | No BSL                             |
| Strontium  | 20  | 36.2-90.1    | 9.3-63.6        | yes                            | 8,213                                    | N               | No BSL                             |
| Thallium   | 12  | 0.11-1.3     | 0.1-0.24        | yes                            | 0.9                                      | N               | <b>Yes</b> ASL                     |
| Tin        | 27  | 3.9-6.0      | ND              | ≥50% ND Site                   | 8,213                                    | N               | No BSL                             |
| Vanadium   | 40  | 7.9-31.8     | 5.6-19.2        | yes <sup>c</sup>               | 96                                       | N               | No BSL                             |
| Zinc       | 479 | 37.4-64,300  | 72.5-753        | yes                            | 4,100                                    | N               | <b>Yes</b> ASL                     |

## Notes-

CoPC - chemical of potential concern

ND - not detected

C - screening level based on cancer with a carcinogenic risk limit of  $1 \times 10^{-6}$ 

N - screening level based on noncarcinogenic health effects with a target hazard quotient of 0.1

Reason for selection

ASL - above screening levels

Reasons for deletion

BSL - below screening level

REF - below or consistent with reference levels

<sup>a</sup> Results of statistical comparison. Bold indicates chemicals for which statistical testing indicated site concentrations to be greater than reference concentrations at a significance level of  $\alpha = 0.10$ .

<sup>b</sup> Assumptions of ANOVA model were not met, thus conclusions result from non-parametric p-value.

<sup>c</sup> Assumptions of ANOVA model were met, thus conclusions result from parametric p-value.

<sup>d</sup> Residential screening toxicity values represent arctic zone soil cleanup levels (from 18 AAC 75.341, Table B1) divided by 10. Where no Table B1 value exists, screening values were calculated based on residential formulas and input parameters (DEC 2008).

Table S2. Freshwater environment CoPC screening for stream surface water (µg/L)

| Chemical   | N   | Site       | Reference  | Site >                  | Drinking           | Fish        |                    |      | CoPC       | Rational for         |
|------------|-----|------------|------------|-------------------------|--------------------|-------------|--------------------|------|------------|----------------------|
|            |     | Range      | Range      | Reference? <sup>a</sup> | Water              | Consumption | Screening          | Flag |            |                      |
|            |     |            |            |                         | Screening          |             | Level <sup>c</sup> |      | (Y/N)      | Selection or         |
|            |     |            |            |                         | Level <sup>c</sup> |             |                    |      |            | Deletion             |
| Aluminum   | 229 | 6.5-4,060  | 17.3-2,770 | no                      | 3,650              | N           |                    |      | No         | REF                  |
| Antimony   | 13  | 0.14-0.6   | ND-0.08    | >50%ND Site             | 0.6                | N           | 1.4                | N    | <b>No</b>  | BSL                  |
| Arsenic    | 13  | ND         | ND-2.2     | >50%ND Site             | 5                  | C           | 0.018              | C    | No         | ND/REF <sup>d</sup>  |
| Barium     | 13  | 12.2-266   | 86.1-222   | <sup>b</sup>            | 200                | N           |                    |      | No         | REF                  |
| Cadmium    | 228 | 0.03-0.4   | ND-0.07    | >50%ND Site             | 0.5                | N           |                    |      | No         | BSL                  |
| Chromium   | 17  | ND         | 0.17-3.7   | >50%ND Site             | 10                 | N           |                    |      | No         | ND/BSL               |
| Cobalt     | 13  | 0.09-0.33  | 0.12-2.72  | no                      | 73                 | N           |                    |      | No         | BSL/REF              |
| Copper     | 17  | 0.3-1.23   | 0.6-5.4    | no                      | 130                | N           | 130                | N    | No         | BSL/REF              |
| Fluoride   | 30  | 40-120     | 30-40      | yes                     | 219,000            | N           |                    |      | No         | BSL                  |
| Iron       | 229 | 6.0-10,300 | 64.2-6,710 | <sup>b</sup>            | 1,095              | N           |                    |      | No         | REF                  |
| Lead       | 229 | 0.018-7.3  | 0.02-1.9   | >50%ND Site             | 1.5                | N           |                    |      | <b>Yes</b> | ASL                  |
| Manganese  | 17  | 0.72-36    | 4.87-128   | no                      | 87.6               | N           | 5                  | N    | No         | BSL/REF <sup>d</sup> |
| Mercury    | 13  | ND         | ND         | >50%ND Site             | 0.2                | N           | 0.005              | N    | No         | ND/BSL               |
| Molybdenum | 13  | 0.37-2.27  | 0.02-0.17  | yes                     | 18.25              | N           |                    |      | No         | BSL                  |
| Nickel     | 13  | 0.26-6.71  | 1.06-10.5  | no                      | 10                 | N           | 61                 | N    | No         | BSL/REF              |
| Selenium   | 28  | 0.067-1.2  | ND         | 100%ND Ref              | 5                  | N           | 17                 | N    | No         | BSL                  |
| Silver     | 13  | ND         | ND-0.03    | >50%ND Site             | 18                 | N           |                    |      | No         | ND/BSL               |
| Strontium  | 13  | 19.4-172   | 32.5-81.1  | no                      | 2,190              | N           |                    |      | No         | BSL/REF              |
| Thallium   | 28  | 0.04-0.55  | ND-0.014   | >50%ND Site             | 0.2                | N           | 0.17               | N    | <b>Yes</b> | ASL                  |
| Tin        | 13  | 1.2-5.3    | ND         | >50%ND Site             | 2,190              | N           |                    |      | No         | BSL                  |
| Vanadium   | 13  | 0.67-0.93  | 0.16-5.6   | >50%ND Site             | 26                 | N           |                    |      | No         | BSL/REF <sup>d</sup> |
| Zinc       | 229 | 1.0-60     | 0.31-9.8   | >50%ND Site             | 1,100              | N           | 910                | N    | No         | BSL                  |

Notes-

CoPC - chemical of potential concern

ND - not detected

C - screening level based on cancer with a carcinogenic risk limit of  $1 \times 10^{-6}$

N - screening level based on noncarcinogenic health effects with a target hazard quotient of 0.1

Reason for selection

ASL - above screening levels

Reasons for deletion

BSL - below screening level

ND - not detected in any site sample

REF - below or consistent with reference levels

<sup>a</sup> Results of statistical comparison. Bold indicates chemicals for which statistical testing indicated site concentrations to be greater than reference concentrations at a significance level of  $\alpha = 0.10$ .

<sup>b</sup> Comparison not made because 90 percent confidence interval for the site mean concentration spans zero, due to small sample size and/or high variability.

<sup>c</sup> Screening levels represent arctic zone drinking water cleanup levels (from 18 AAC 75.345, Table C) divided by 10. Where no Table C value exists, screening values were calculated based on residential drinking water formulas and input parameters (DEC 2008).

<sup>d</sup> The maximum site concentration of the analyte was less than the maximum reference concentration.

<sup>e</sup> Screening levels represent the AWQC protective for human consumption of fish/shellfish and domestic drinking water usage from the water body (DEC03A). The AWQC were modified, when necessary, to assume a target hazard quotient of 0.1. The arsenic screening toxicity value is a federal ambient water quality criteria (USEPA02D) and assumes a target risk of 10–6. The ARAR represents the Washington State cleanup level for surface water and is protective of bioaccumulation into, and human consumption of, seafood (ECOLO96A).
